# Supplementary material for: Global incidence, prevalence, deaths, and disability-adjusted life-years (DALYs) for idiopathic epilepsy, 1990-2021: a systematic analysis for the Global Burden of Disease Study 2021
Source: Research Square preprint supplement (doi:10.21203/rs.3.rs-5857278/v1), 2025-02-03

**Global incidence, prevalence, deaths, and disability-adjusted life-years (DALYs) for** **idiopathic epilepsy, 1990-2021: a systematic analysis for the Global Burden of Disease Study 2021**

**Figure legend**

**Figure S1.** Numbers and age-standardized rates of idiopathic epilepsy-related incidence, prevalence, deaths, and DALYs for both sexes in 2021. Abbreviations: DALYs, disability-adjusted life years.

**Figure S2.** Numbers and age-standardized rates of idiopathic epilepsy-related incidence, prevalence, deaths, and DALYs for different age groups in 2021. Abbreviations: DALYs, disability-adjusted life years.

**Figure S3.** Numbers and age-standardized rates of idiopathic epilepsy-related incidence, prevalence, deaths, and DALYs for different SDI regions in 2021. Abbreviations: DALYs, disability-adjusted life years.

**Figure S4.** Numbers and age-standardized rates of idiopathic epilepsy-related incidence, prevalence, deaths, and DALYs for different GBD regions in 2021. Abbreviations: DALYs, disability-adjusted life years.

**Figure S5.** Trends in the numbers and age-standardized rates of idiopathic epilepsy-related incidence, prevalence, deaths, and DALYs globally from 1990 to 2021. Abbreviations: DALYs, disability-adjusted-life-years.

**Figure S6.** Trends in the numbers and age-standardized rates of idiopathic epilepsy-related incidence, prevalence, deaths, and DALYs globally by sexes from 1990 to 2021. Abbreviations: DALYs, disability-adjusted-life-years.

**Figure S7.** Trends in the numbers and age-standardized rates of idiopathic epilepsy-related incidence, prevalence, deaths, and DALYs globally by age groups from 1990 to 2021. Abbreviations: DALYs, disability-adjusted-life-years.

**Figure S8.** Trends in the numbers and age-standardized rates of idiopathic epilepsy-related incidence, prevalence, deaths, and DALYs globally by SDI regions from 1990 to 2021. Abbreviations: DALYs, disability-adjusted-life-years.

**Figure S9.** The EAPC of the idiopathic epilepsy-related ASR of incidence, prevalence, deaths, and DALYs between 1990 and 2021. Abbreviations: EAPC, estimated annual percentage change; ASR, age-standardized rate; DALYs, disability-adjusted-life-years.

**Figure S10.** The relative change in the numbers of incidence, prevalence, deaths, and DALYs between 1990 and 2021. Abbreviations: DALYs, disability-adjusted-life-years.

**Figure S1.** Numbers and age-standardized rates of idiopathic epilepsy-related incidence, prevalence, deaths, and DALYs for both sexes in 2021. Abbreviations: DALYs, disability-adjusted life years.


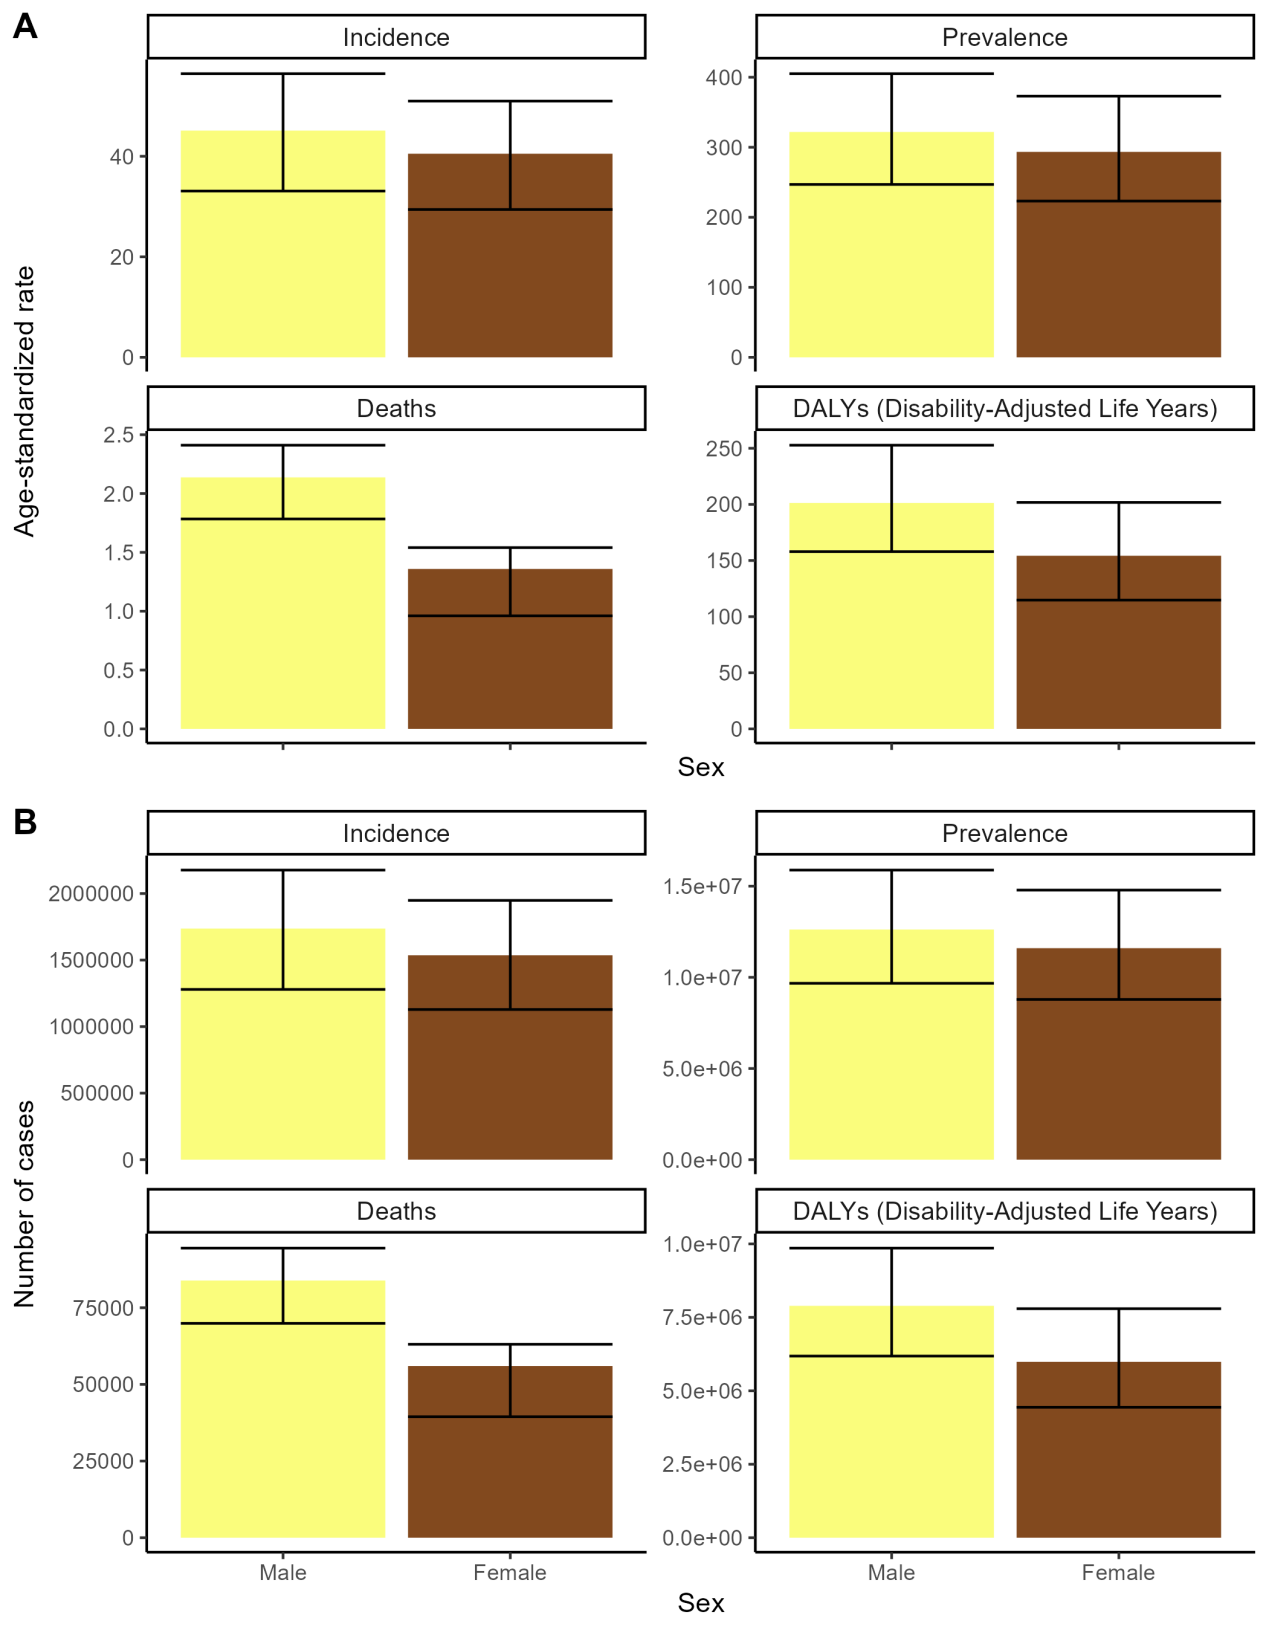


**Figure S2.** Numbers and age-standardized rates of idiopathic epilepsy-related incidence, prevalence, deaths, and DALYs for different age groups in 2021. Abbreviations: DALYs, disability-adjusted life years.


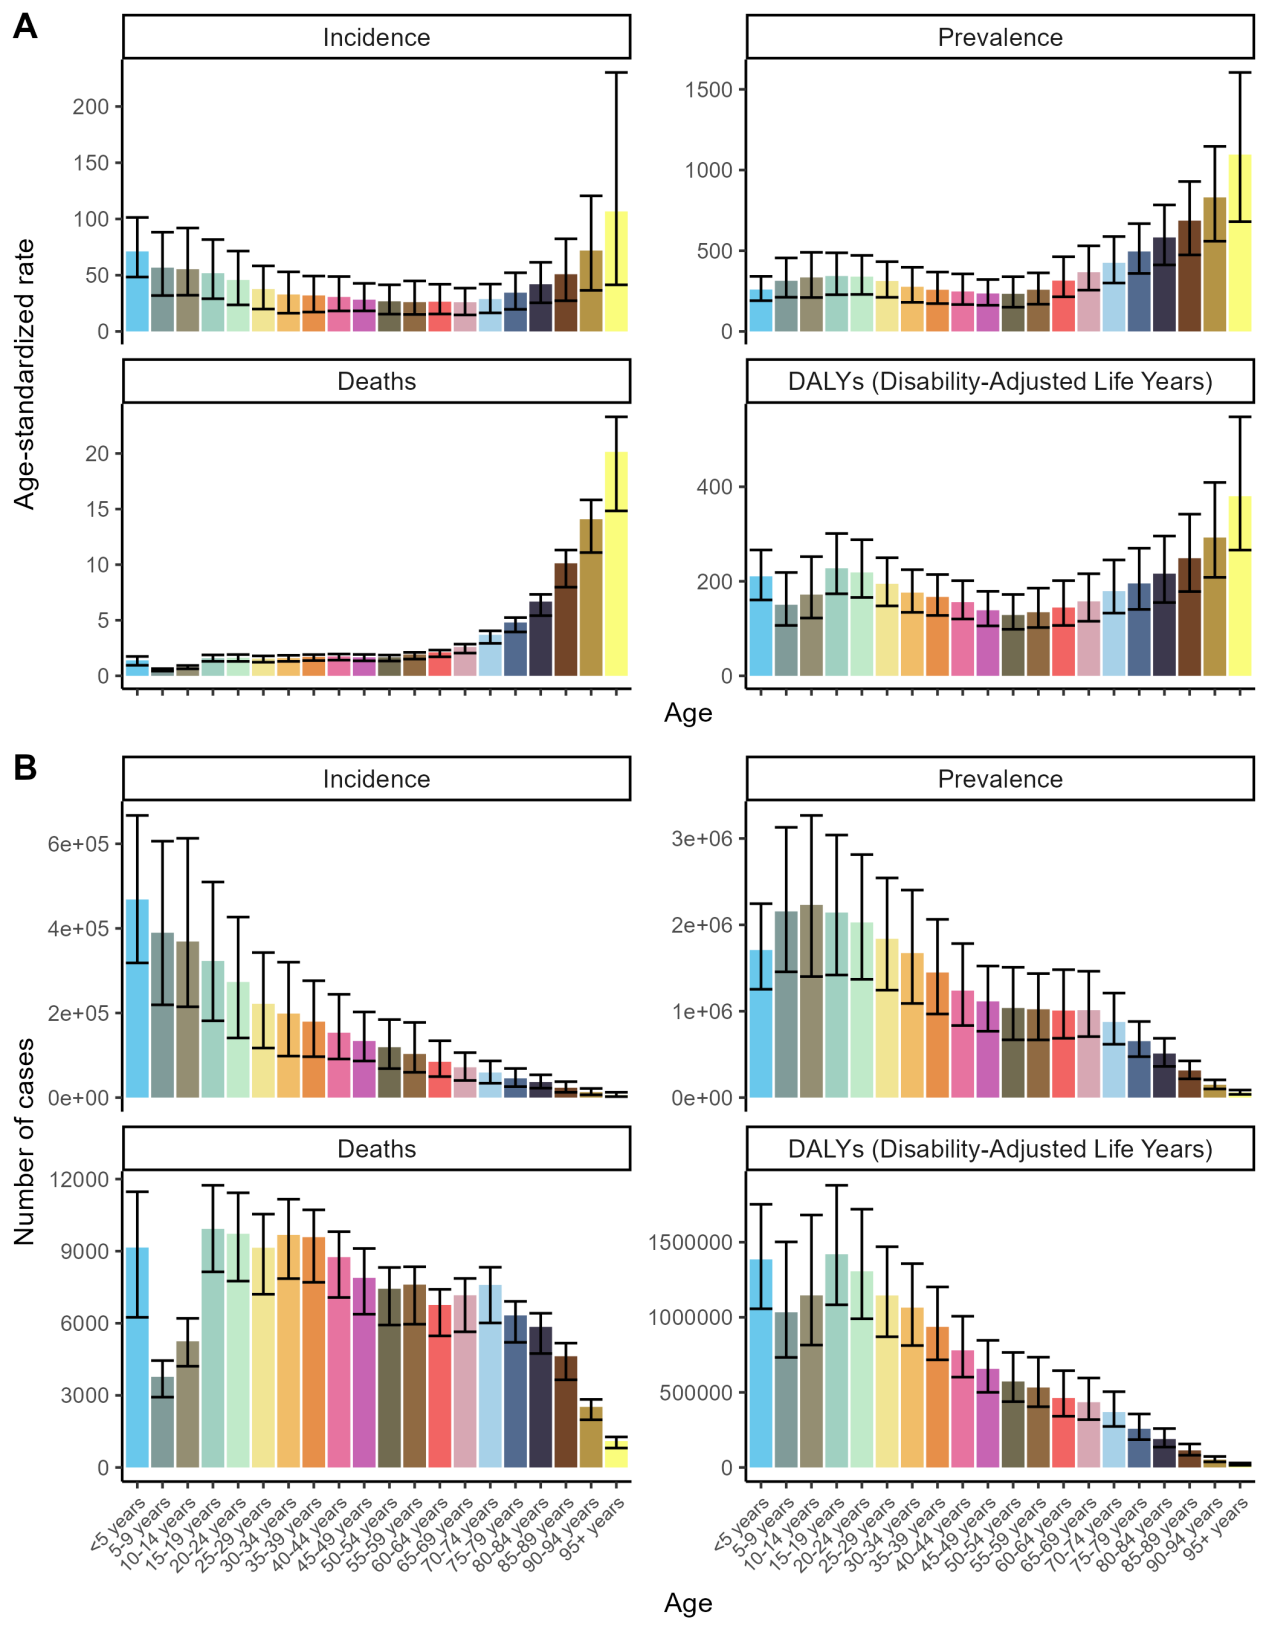


**Figure S3.** Numbers and age-standardized rates of idiopathic epilepsy-related incidence, prevalence, deaths, and DALYs for different SDI regions in 2021. Abbreviations: DALYs, disability-adjusted life years.


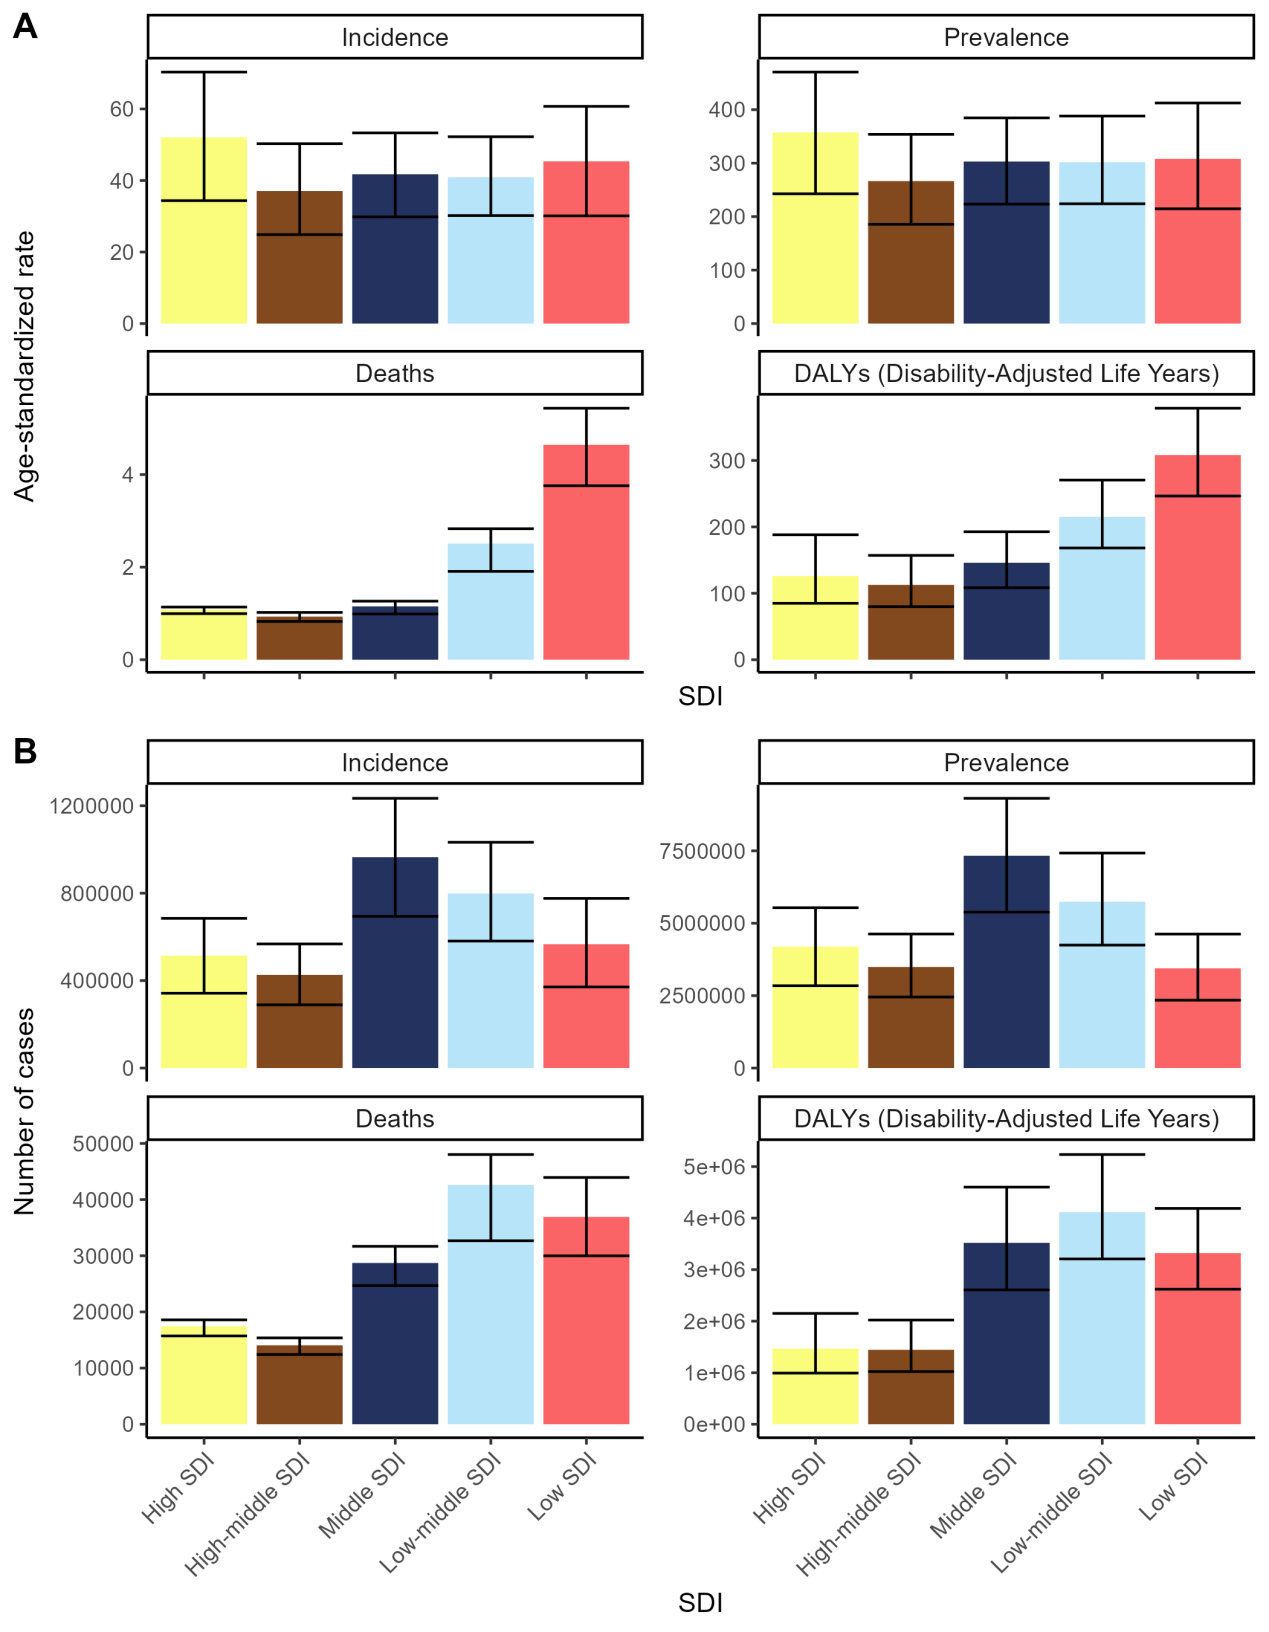


**Figure S4.** Numbers and age-standardized rates of idiopathic epilepsy-related incidence, prevalence, deaths, and DALYs for different GBD regions in 2021. Abbreviations: DALYs, disability-adjusted life years.


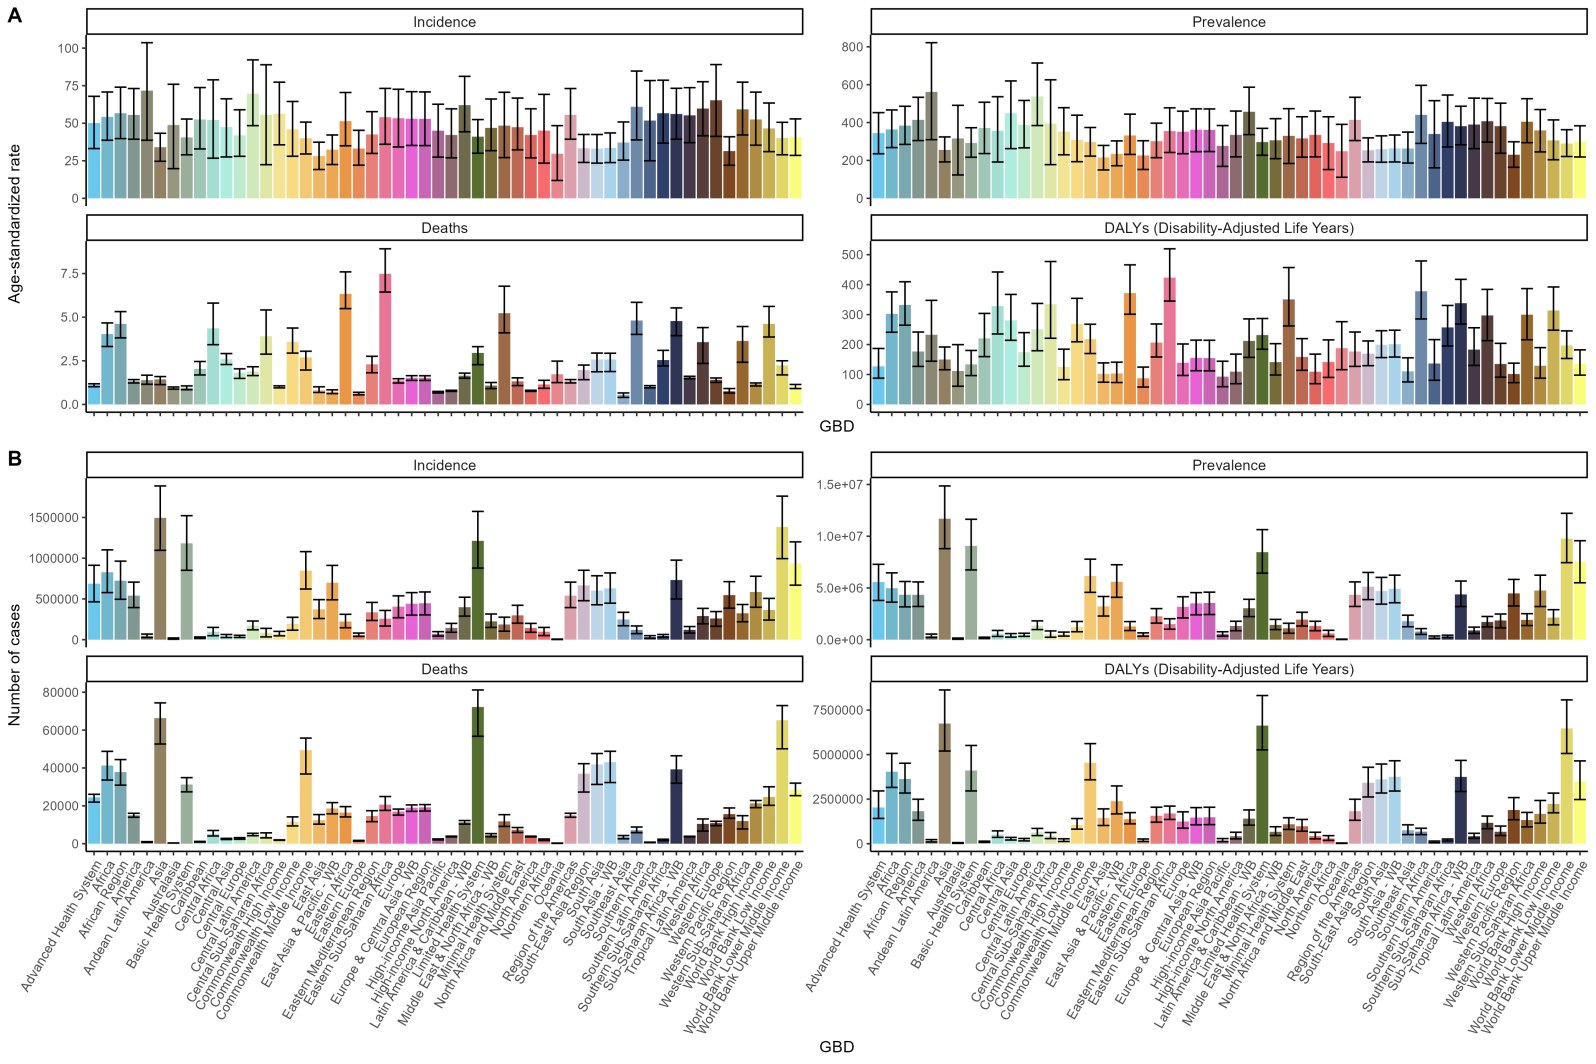


**Figure S5.** Trends in the numbers and age-standardized rates of idiopathic epilepsy-related incidence, prevalence, deaths, and DALYs globally from 1990 to 2021. Abbreviations: DALYs, disability-adjusted-life-years.


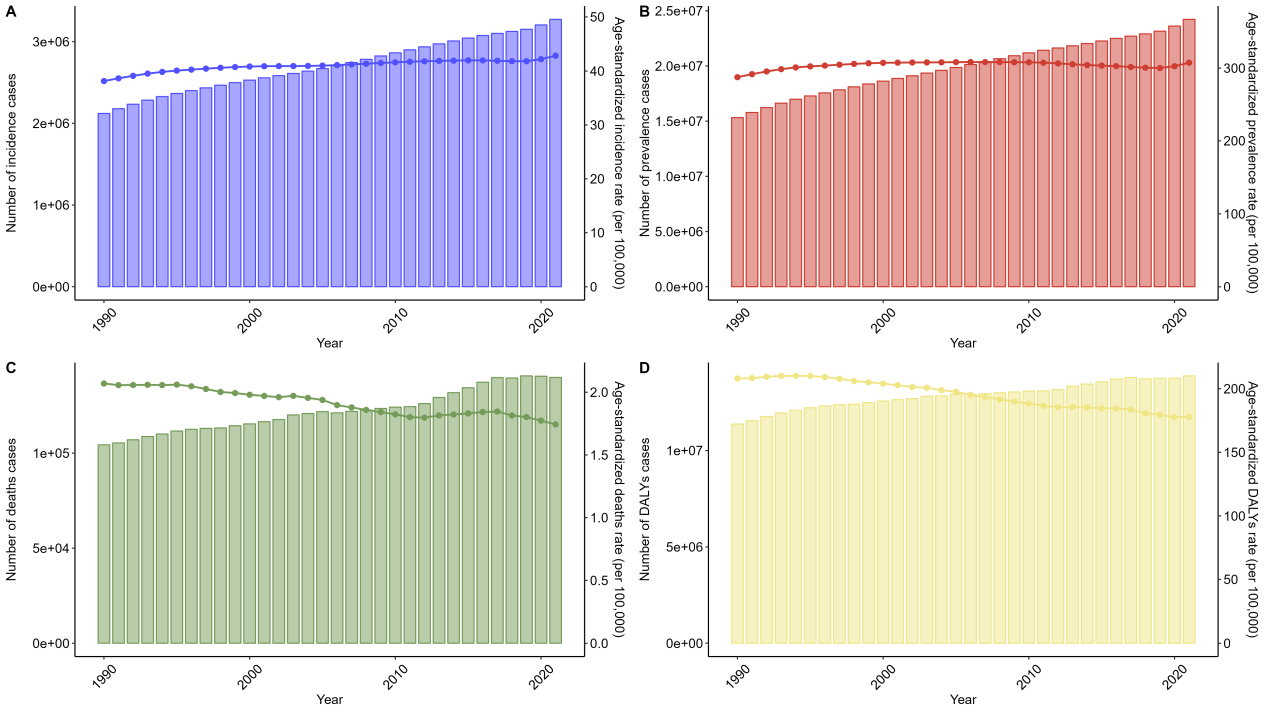


**Figure S6.** Trends in the numbers and age-standardized rates of idiopathic epilepsy-related incidence, prevalence, deaths, and DALYs globally by sexes from 1990 to 2021. Abbreviations: DALYs, disability-adjusted-life-years.


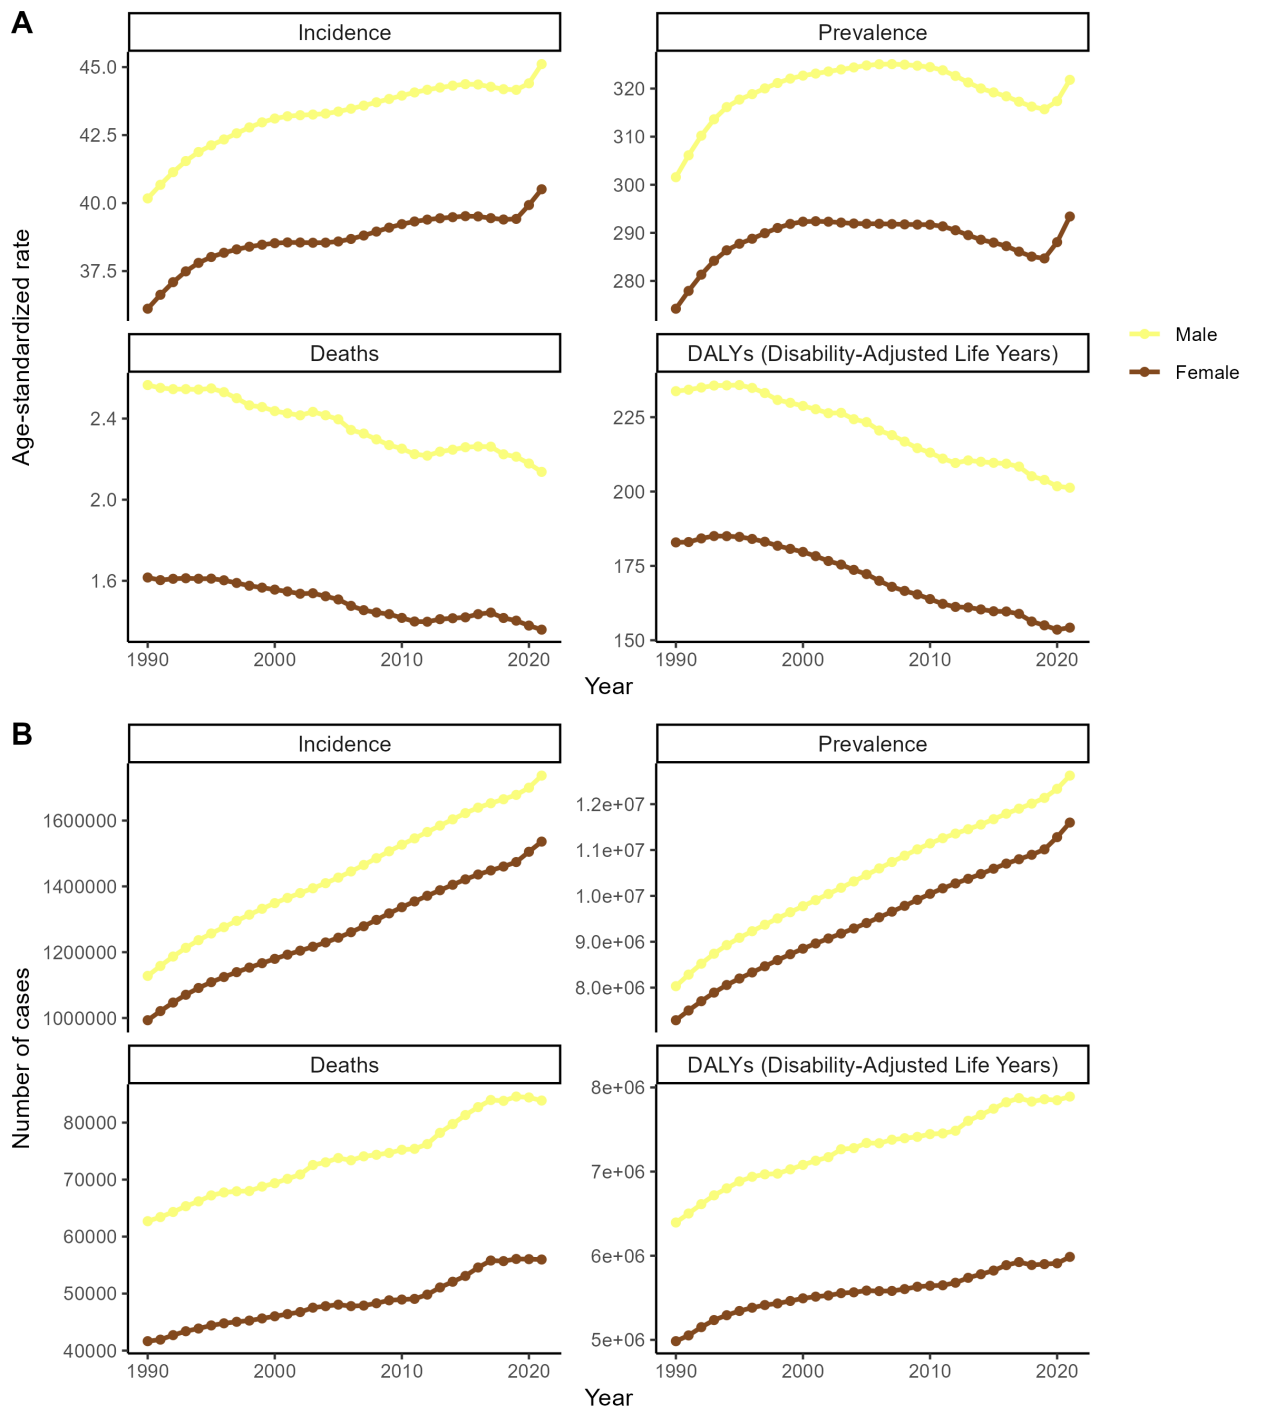


**Figure S7.** Trends in the numbers and age-standardized rates of idiopathic epilepsy-related incidence, prevalence, deaths, and DALYs globally by age groups from 1990 to 2021. Abbreviations: DALYs, disability-adjusted-life-years.


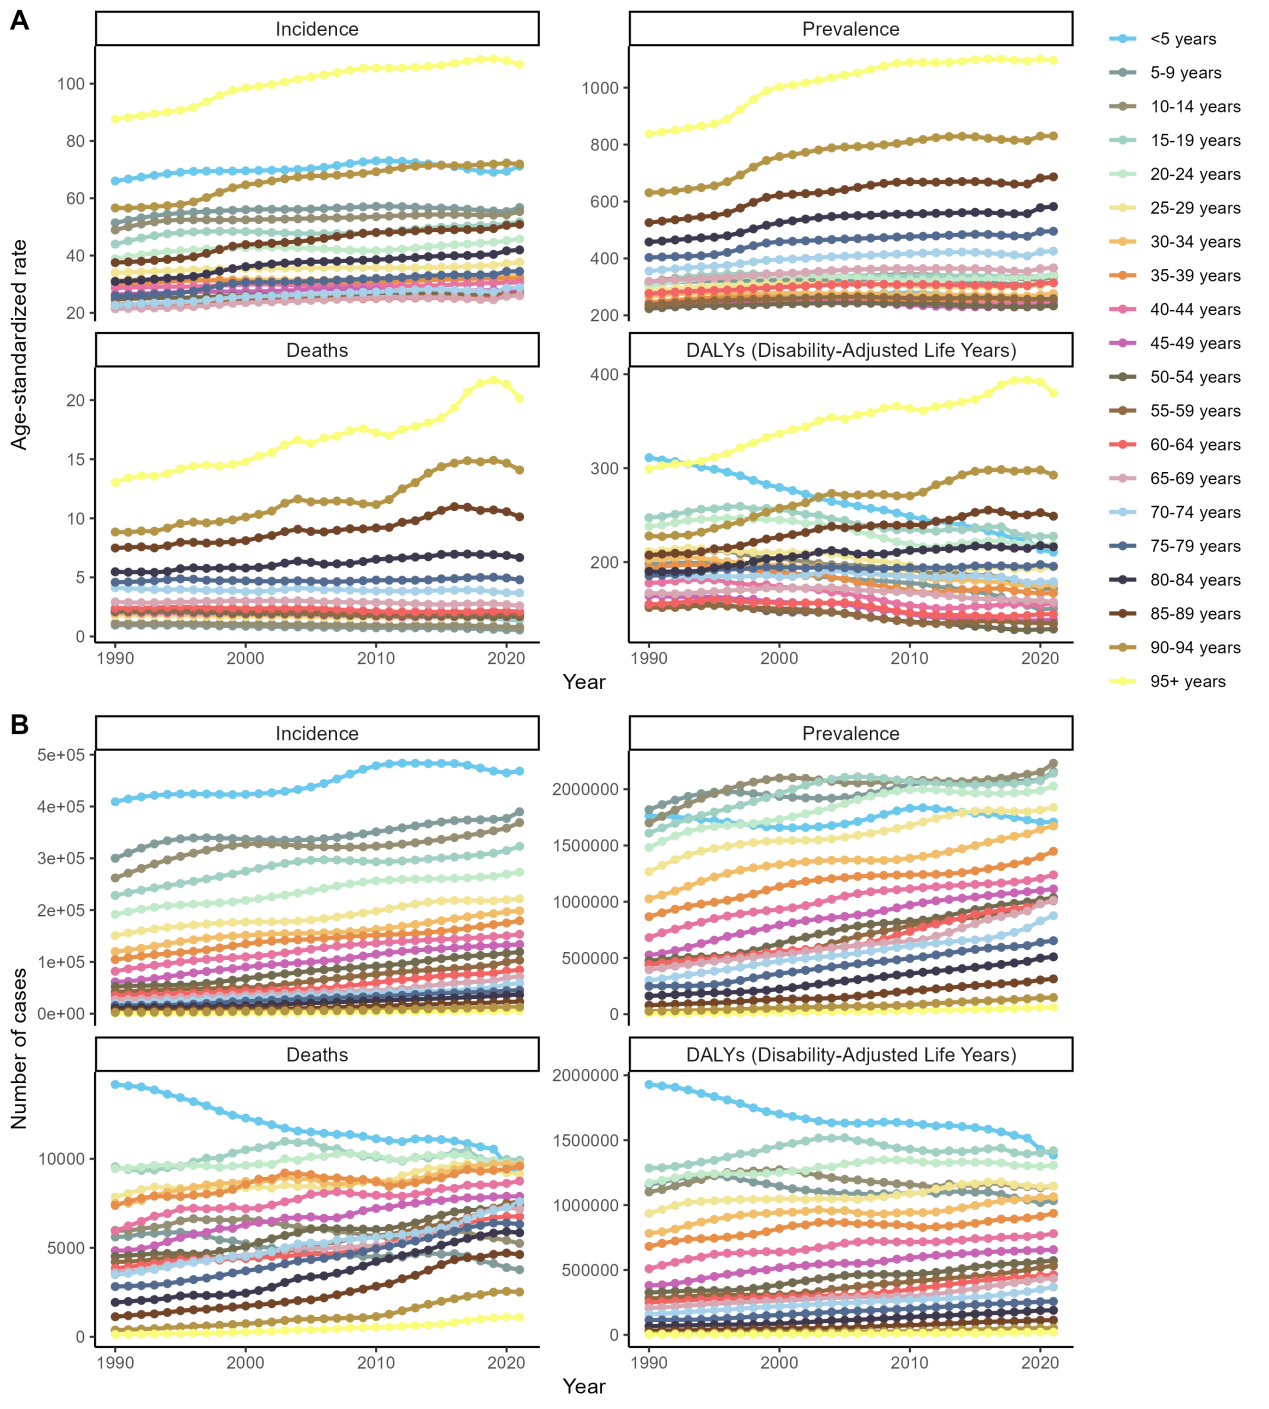


**Figure S8.** Trends in the numbers and age-standardized rates of idiopathic epilepsy-related incidence, prevalence, deaths, and DALYs globally by SDI regions from 1990 to 2021. Abbreviations: DALYs, disability-adjusted-life-years.


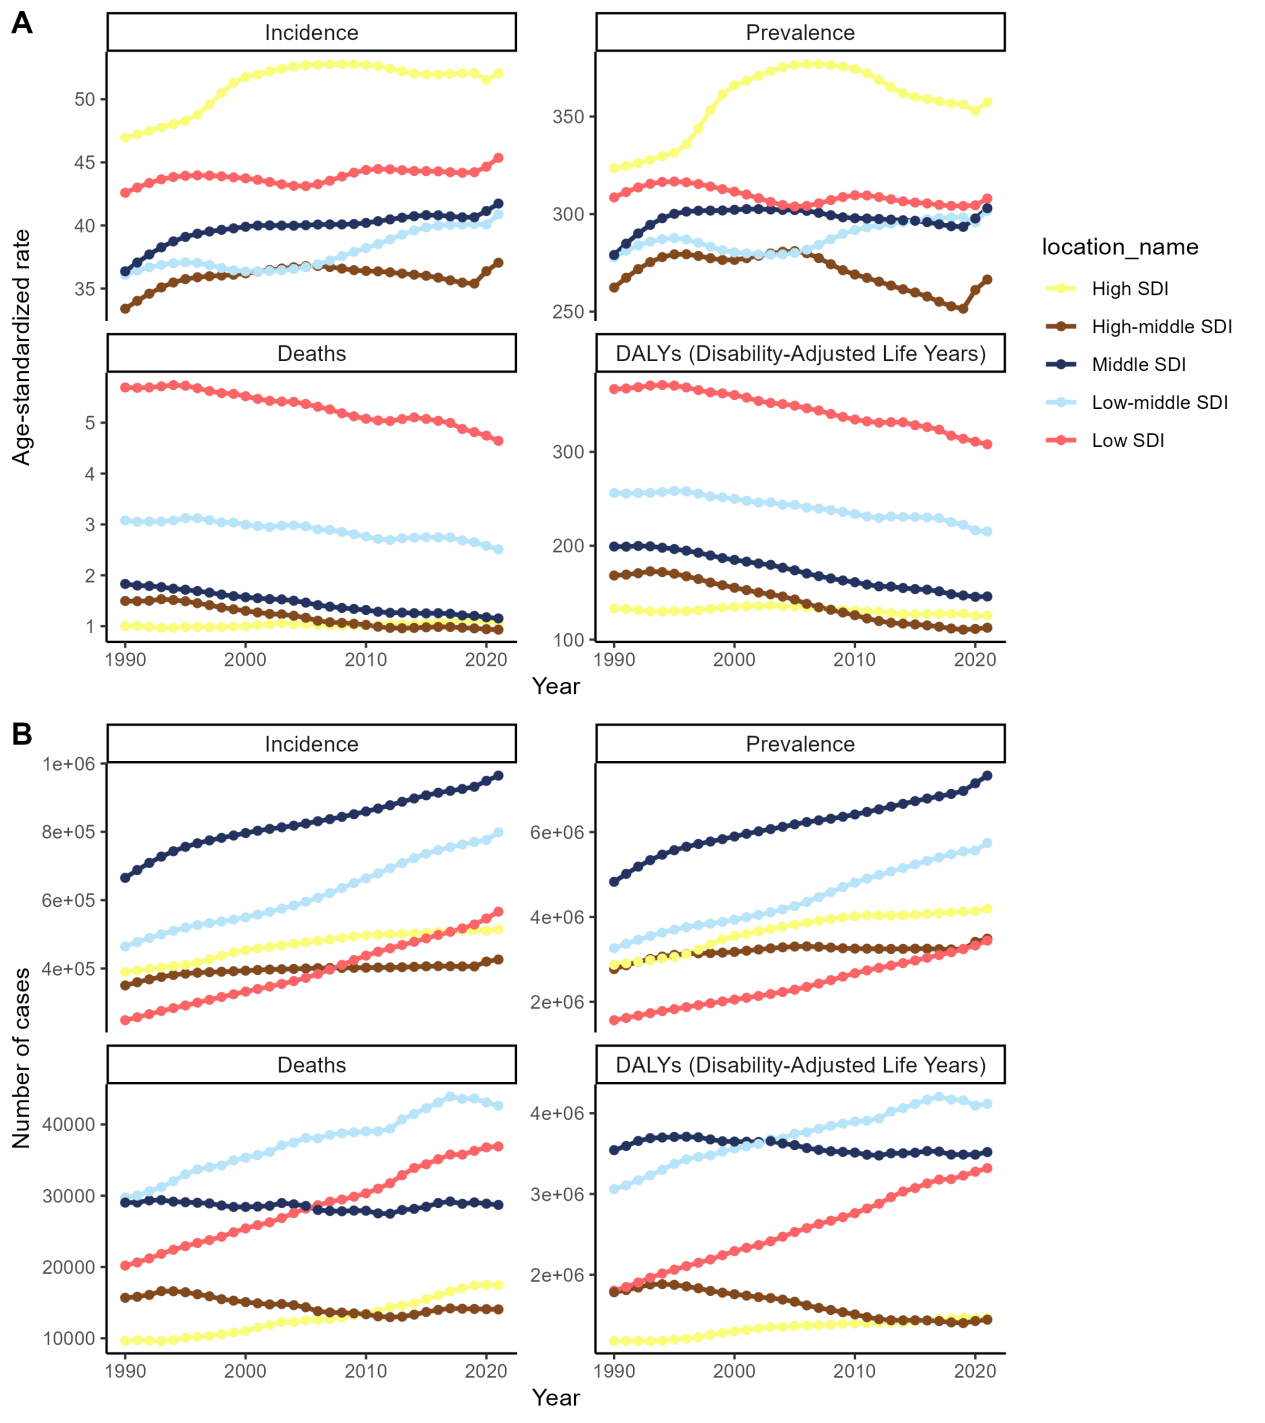


**Figure S9.** The EAPC of the idiopathic epilepsy-related ASR of incidence, prevalence, deaths, and DALYs between 1990 and 2021. Abbreviations: EAPC, estimated annual percentage change; ASR, age-standardized rate; DALYs, disability-adjusted-life-years.


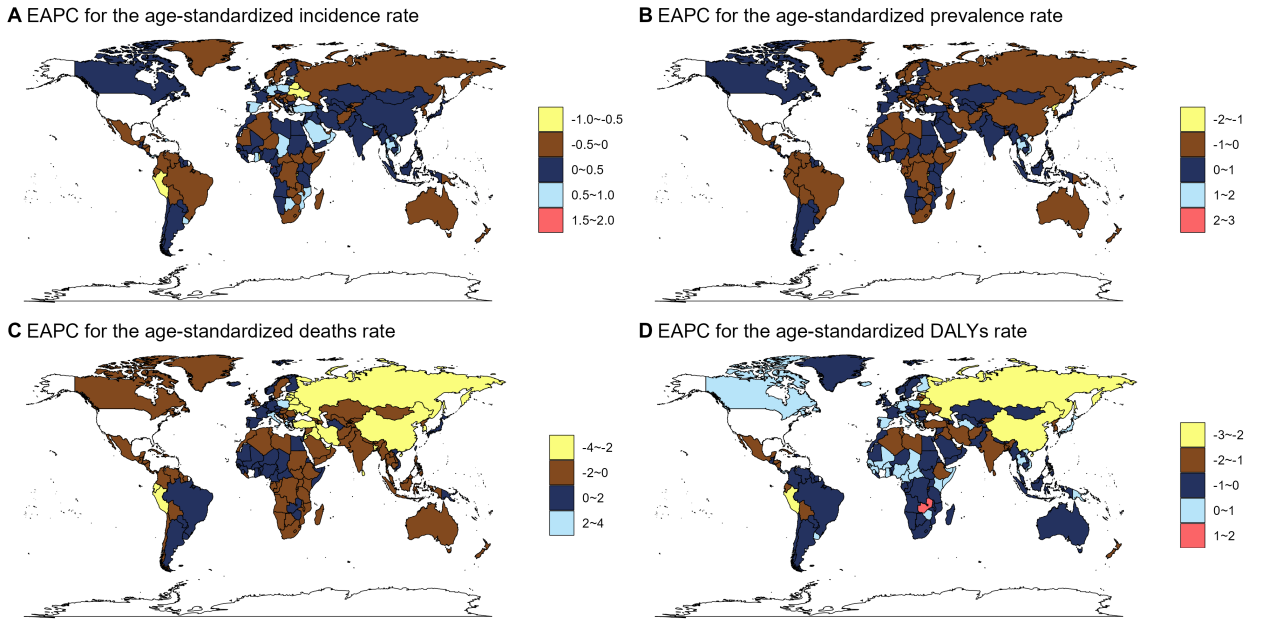


**Figure S10.** The relative change in the numbers of incidence, prevalence, deaths, and DALYs between 1990 and 2021. Abbreviations: DALYs, disability-adjusted-life-years.


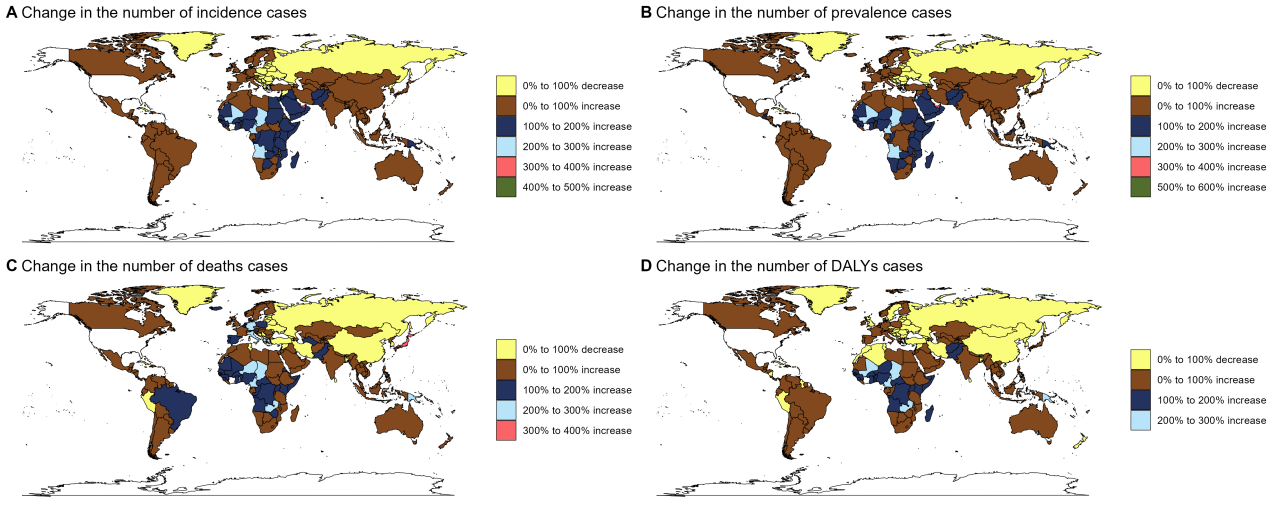

Supplement: Supplementary file 1 [file 19757db1b16edf07fde391c3.docx]
